# Supplementary material
Source: PubMed Central journal article supplement (PMC3421158)
Supplement: 1206786109_pnas.201206786SI.pdf [file 1206786109_pnas.201206786SI.pdf]

# Supporting Information

El Ayadi et al. 10.1073/pnas.1206786109

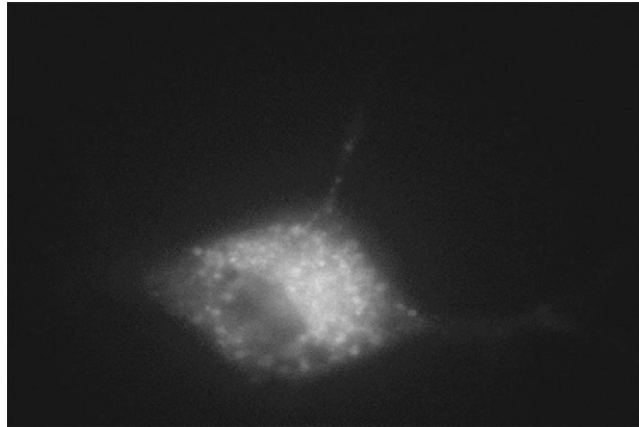

**Movie S1.** APP-GFP localization in PC12 cells treated with cycloheximide. The movie is condensed from 40 min of recording.

[Movie S1](#)

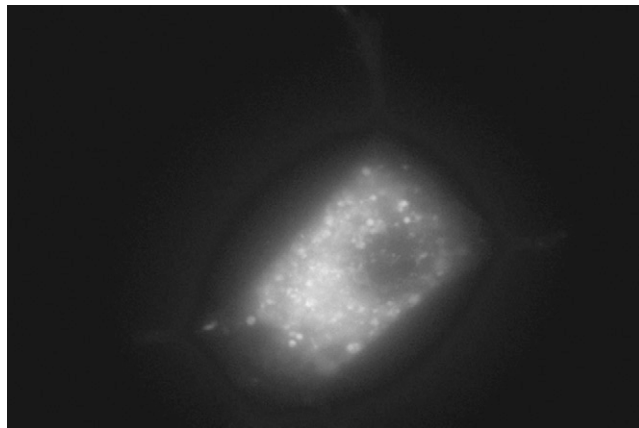

**Movie S2.** APP-GFP localization in PC12 cells overexpressing ubiquitin-1 and treated with cycloheximide. The movie is condensed from 60 min of recording.

[Movie S2](#)
